# Supplementary material for: pH-responsive polymeric carrier encapsulated magnetic nanoparticles for cancer targeted imaging and delivery
Source: Royal Society of Chemistry journal article supplement (doi:10.1039/c1jm11195g), 2011-01-01
Supplement: c1jm11195g.pdf [file c1jm11195g.pdf]

**pH-Responsive polymeric carrier encapsulated magnetic nanoparticles for  
cancer targeted imaging and delivery**

**Dongyun Chen,<sup>a</sup> Xuwei Xia,<sup>a</sup> Hongwei Gu,<sup>a</sup> Qingfeng Xu,<sup>a</sup> Jianfeng Ge,<sup>a</sup> Yonggang Li,<sup>b</sup>**

**Najun Li\*<sup>a</sup> and Jianmei Lu\*<sup>a</sup>**

<sup>a</sup> *Key Laboratory of Organic Synthesis of Jiangsu Province, College of Chemistry, Chemical Engineering and Material Science, Soochow University, Suzhou, Jiangsu, China 215123*

<sup>b</sup> *Department of Radiology, the First Affiliated Hospital of Soochow University, Soochow University, Suzhou, China, 215006.*

\*Correspondence to: J.M. Lu (E-mail: [lujm@suda.edu.cn](mailto:lujm@suda.edu.cn)) and N.J. Li (E-mail: [linajun@suda.edu.cn](mailto:linajun@suda.edu.cn))

**Supplementary Information**

**Table S1** Properties of HAMA(x)-b-DBAM(y) with different feed ratios.

| Feed ratio (x:y) | Conversion (%) | $M_n$ | $M_n/M_w$ | Polymer composition (x:y) | Assemble with SIONPs in PBS |
|------------------|----------------|-------|-----------|---------------------------|-----------------------------|
| 12:1             | 95             | 46400 | 2.0       | 11.7:1                    | Clear (0.268)*              |
| 10:1             | 96             | 49190 | 1.4       | 9.9:1                     | Clear (0.186)               |
| 6:1              | 95             | 53200 | 2.0       | 5.8:1                     | Clear (0.238)               |
| 1:1              | 94             | 42400 | 1.9       | 1:0.8                     | Cloudy                      |
| 1:4              | 96             | 23400 | 2.3       | 1:3.9                     | Cloudy                      |

\* Colloid PDI determined by DLS.

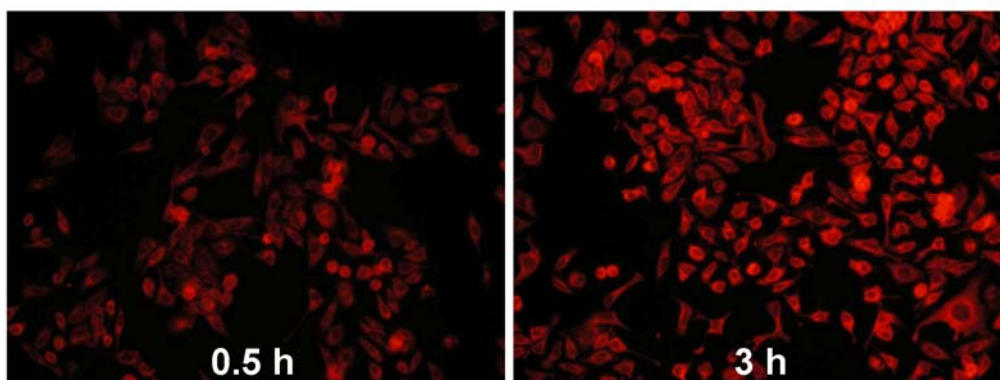

**Figure S1** Fluorescence images of 7402 cells incubated with HAMAFA-*b*-DBAM-coated SPIONPs for 0.5 h and 3 h.

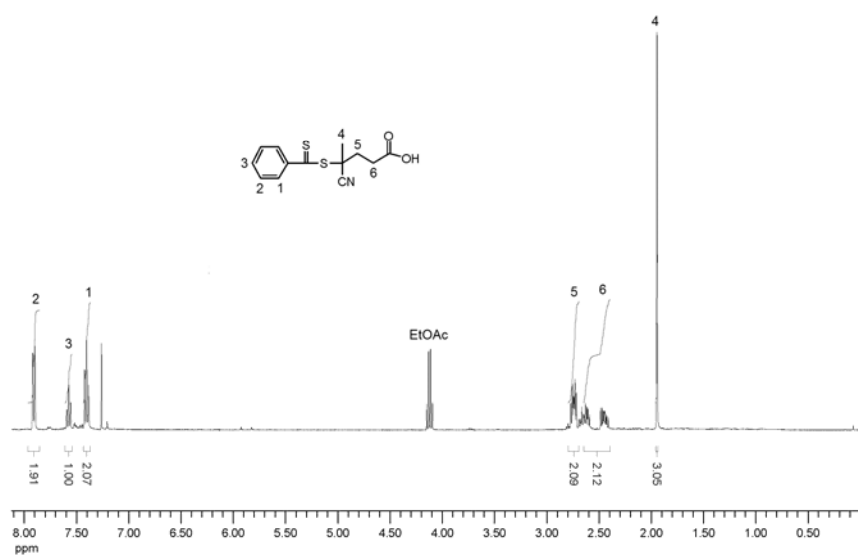

**Figure S2** <sup>1</sup>H NMR spectrum of RAFT agent CAD

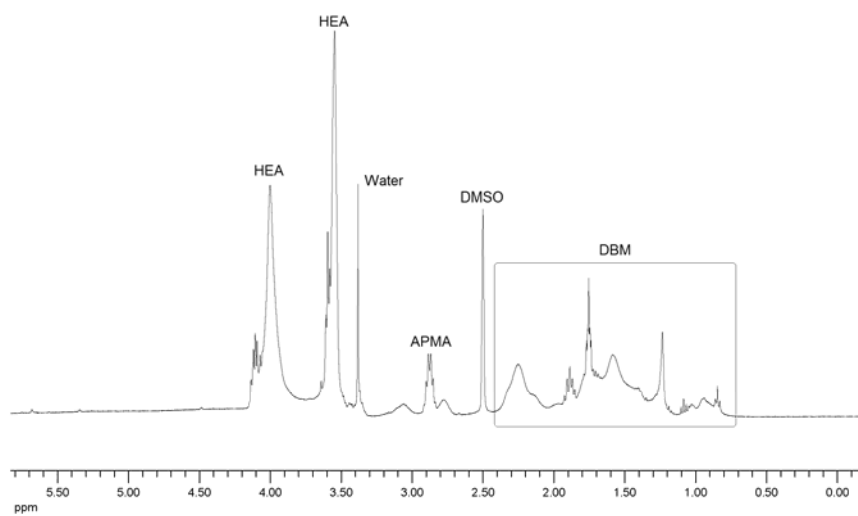

**Figure S3** <sup>1</sup>H NMR spectrum HAMA-*b*-DBAM

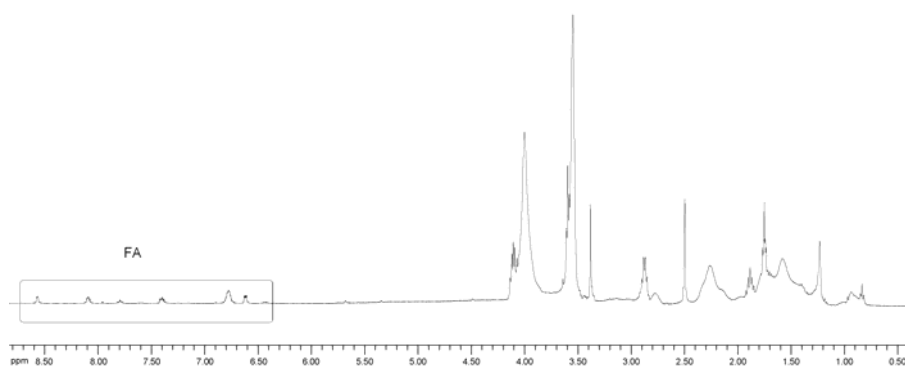

**Figure S4** <sup>1</sup>H NMR spectrum HAMAFA-*b*-DBAM

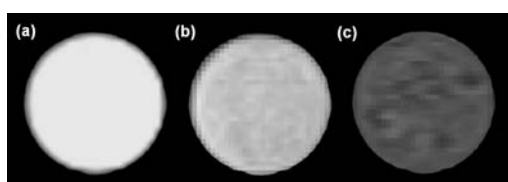

**Figure S5** T2-weighted MR images of KB cells incubated with HAMA-*b*-DBAM-coated SPIONPs (b) and HAMAFA-*b*-DBAM-coated SPIONPs (c) for 3 h (Figure (a) as control, [Fe] =  $8.38 \times 10^{-4}$  mg/mL).
